# Supplementary material for: Enhanced co-culture and enrichment of human natural killer cells for the selective clearance of senescent cells
Source: publisher site journal article supplement (doi:10.18632/aging.203931), 2022-03-04
Supplement: Supplementary file [file aging-v14i5-203931-supplementary-material-SD1.pdf]

## SUPPLEMENTARY FIGURES

**A**

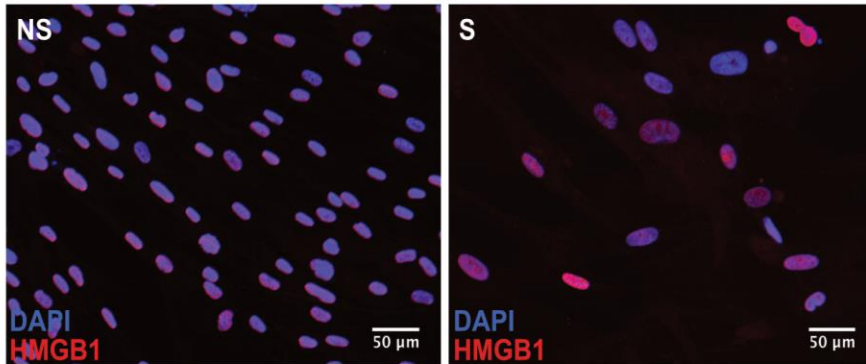

**B**

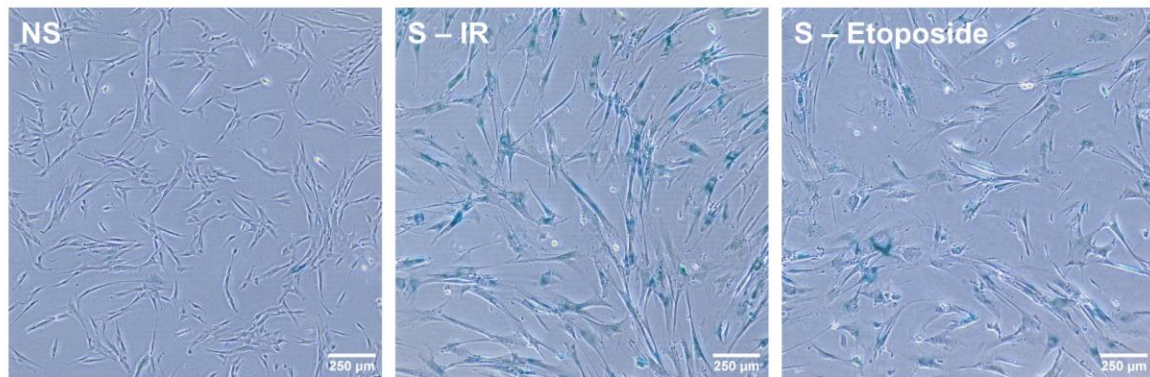

**C**

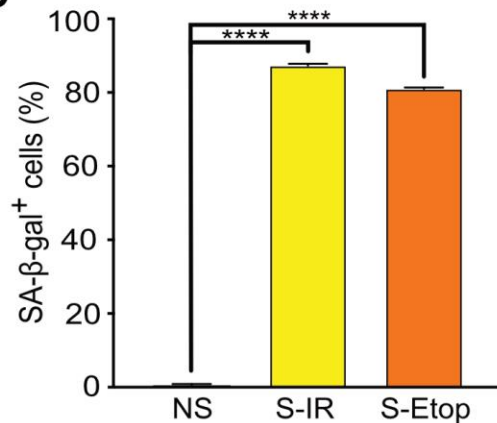

**Supplementary Figure 1. Senescent IMR-90 cells express markers of senescence.** Related to Figure 1. (A) Representative immunofluorescence images of NS and S IMR-90 cells stained for HMGB1 (red). Nuclei were stained with Hoechst (blue). (B) Representative images of SA-β-Gal-stained senescent (S – IR, S – Etoposide) and non-senescent (NS) IMR-90 cells. SA-β-Gal staining was performed on day 9 after treatment with irradiation (20 Gy) or Etoposide (20 µM, 48 h). (C) Quantification of SA-β-gal-positive IMR-90 cells in NS, S – IR and S – Etoposide. Four fields were quantified per well (n=3) with a total of 3483, 1079 and 777 cells counted for NS, S – IR and S – Etoposide, respectively.

**A**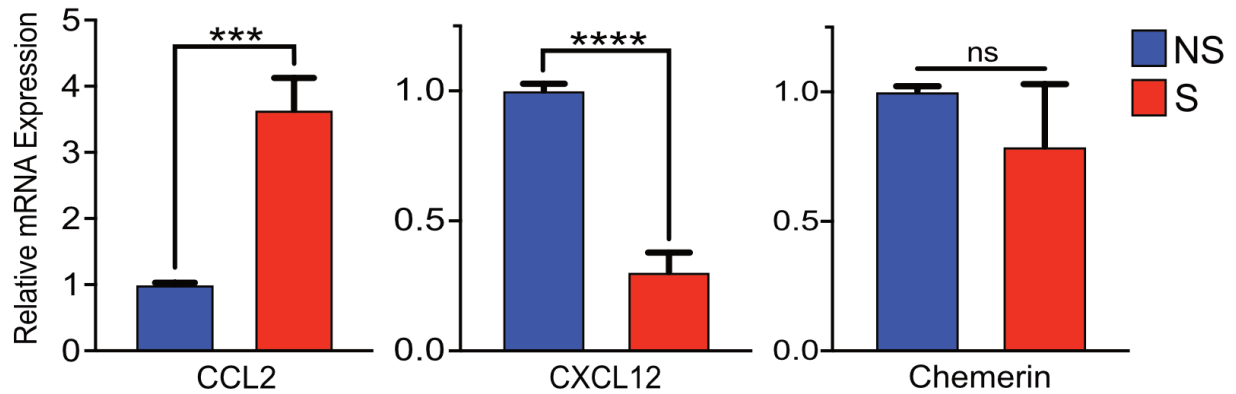**B**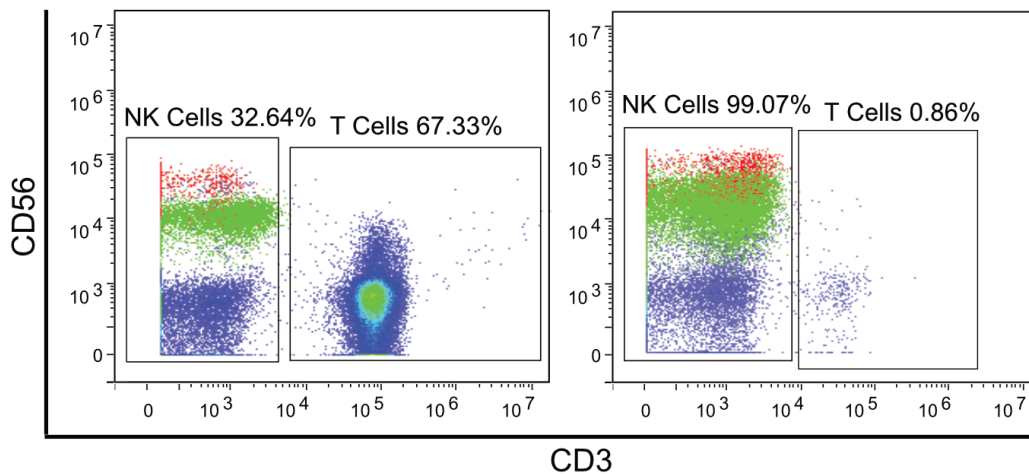**C-i**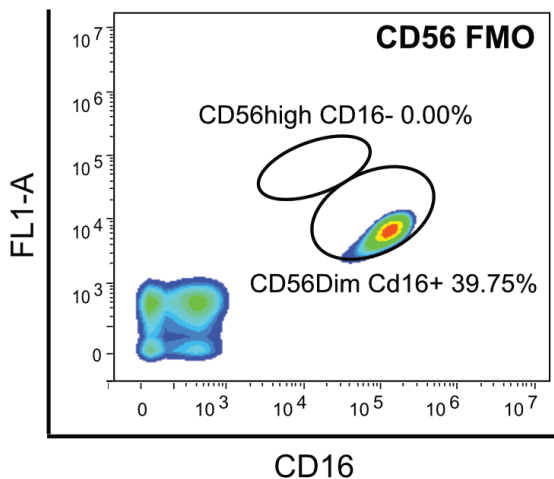**C-ii**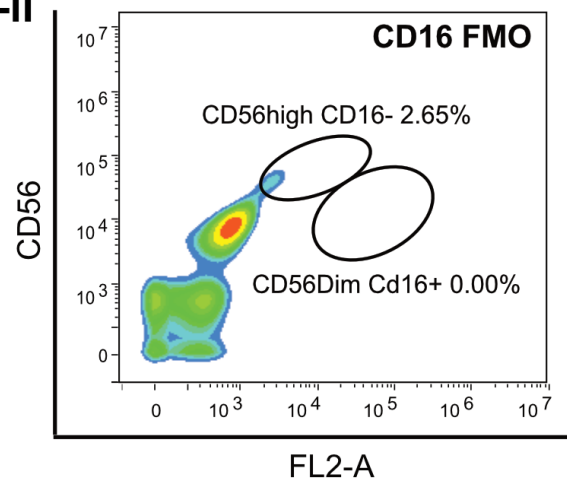

**Supplementary Figure 2. Cytokine expression of non-senescent versus senescent IMR-90 cells and NK cell enrichment.** (A) qRT-PCR of *CCL2*, *CXCL12* and *Chemerin* mRNA in non-senescent and senescent IMR-90 fibroblasts. The results are presented as mean fold change in NS compared to S of two independent experiments performed in triplicate, and error bars represent  $\pm$ SEM. Statistical analysis performed using unpaired t test. \* $p < 0.05$ , \*\* $p < 0.01$ , and \*\*\* $p < 0.001$ . (B) Flow cytometry analysis of CD56 and CD3 expressing cells before (left) and after (right) enrichment. Rosette antibody-based isolation resulted in a pure population (99.07%) of NK cells. Red is CD56<sup>bright</sup> and green is CD56<sup>dim</sup> NK cells. (C-i) Fluorescence Minus One (FMO) control for CD56 from a representative donor. NK cell populations were stained with anti-CD16 antibody. (C-ii) FMO control for CD16. NK cell populations were stained with anti-CD56 antibody.

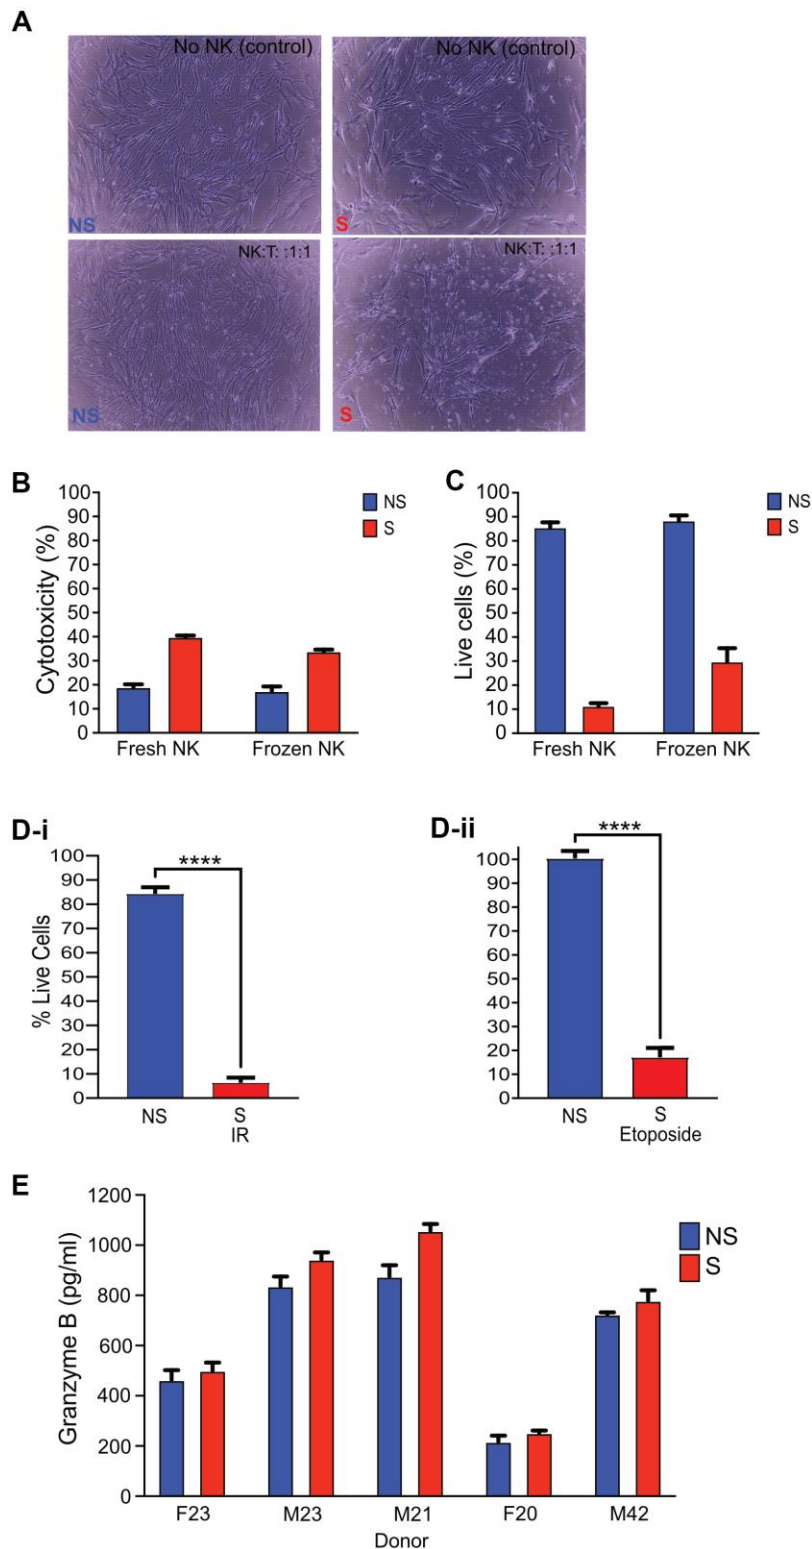

**Supplementary Figure 3. Activated primary NK cells selectively eliminate senescent cells.** Related to Figure 3. (A) Representative light microscopy images showing NK cell cytotoxicity towards NS versus S IMR-90 cells after 16 h of co-culture. (B) Cytotoxicity of NK cells that had been freshly isolated 3 d before co-culture (“fresh”) versus NK cells that had been revived from storage in liquid nitrogen 3 d before co-culture (“frozen”) after 16 h of co-culture. Cytotoxicity was evaluated by LDH release. (C) Quantitative analysis of IMR-90 target cell viability after 4 d of co-culture with frozen or fresh NK cells, as measured by Calcein AM. (D-i) Percentage of live cells after 4 d of co-culture with NS cells or fibroblasts induced to senesce by irradiation (20 Gy) or (D-ii) etoposide (20  $\mu$ M, 48 h). (E) Granzyme B production of NK cells from 5 different donors in response to 16 h of incubation with NS or S IMR-90 cells. Donor sex and age are indicated in the figure.
